# Supplementary material
Source: HighWire-hosted journal article supplement (https://cmaj.ca/highwire/filestream/148983/field_highwire_adjunct_files/1/230108-guide-2-at.pdf)
Supplement: 230108-guide-2-at.pdf [file 230108-guide-2-at.pdf]

## Appendix 2: Planning Committee and Forum Participants

### Planning Committee

|                  |                                                                                      |
|------------------|--------------------------------------------------------------------------------------|
| James Downar     | Division Head, Palliative Care, University of Ottawa<br>Ottawa, ON                   |
| David Hartell    | Associate Director, System Development, Canadian Blood Services<br>Ottawa, ON        |
| Laura Hornby     | Research Consultant, Canadian Blood Services<br>Montreal, QC                         |
| Lee James        | Sr. Project Manager, System Development, Canadian Blood Services<br>Vancouver, BC    |
| Ken Lotherington | Sr. Project Manager, System Development, Canadian Blood Services<br>Halifax, NS      |
| Caitlin Mills    | Project Manager, System Development, Canadian Blood Services<br>Toronto, ON          |
| Sam Shemie       | Medical Advisor, Deceased Donation, Canadian Blood Services<br>Montreal, QC          |
| Kim Wiebe        | Medical Director, Medial Assistance in Dying, Shared Health Services<br>Winnipeg, MB |
| Lindsay Wilson   | Sr. Advisor & Lead, System Development, Canadian Blood Services<br>Toronto, ON       |

### International Speakers

|                 |                                                                                                                              |
|-----------------|------------------------------------------------------------------------------------------------------------------------------|
| Jan Bollen      | Anesthesiology, Radboud University Medical Center<br>Nijmegen, Netherlands                                                   |
| Johannes Mulder | Primary Health-Care Adviser/Researcher, Isala Hospital<br>Zwolle/Family Medicine Group Dalfsen Zwolle<br>Zwolle, Netherlands |

### Listening for Research Panel

|                 |                                                                                                                                                                                                                                               |
|-----------------|-----------------------------------------------------------------------------------------------------------------------------------------------------------------------------------------------------------------------------------------------|
| Aviva Goldberg  | Pediatric Nephrologist/Bioethicist, Health Sciences Centre<br>Winnipeg, MB<br><i>Representing the Canadian Society of Transplantation and the<br/>Canadian Donation and Transplantation Research Program<br/>Listening for Research Panel</i> |
| Patricia Gongal | Director of Strategic Communications, Canadian Donation and<br>Transplantation Research Program<br>Edmonton, AB<br><i>Listening for Research Panel</i>                                                                                        |

Matthew Weiss                      Directeur médical en don d'organes, Transplant Québec  
Quebec City, QC  
*Representing the Canadian Donation and Transplantation Research  
Program*  
*Listening for Research Panel*

**Meeting Participants**

Robert Adams                      Medical Director, Organ Division, Horizon Health Network  
Moncton, NB

Janice Beitel                        Director, Hospital Programs, Education and Professional Practice,  
Trillium Gift of Life Network  
Toronto, ON

Mike Bentley                        Manager, Northern Alberta Organ and Tissue Donation Programs  
Edmonton, AB

Jessica Bonnelly                    Manager, Organ and Tissue Divisions, Horizon Health Network  
Moncton, NB

Michelle Bonnier                    Manager, Southern Alberta Organ & Tissue Donation Program  
Calgary, AB

Catherine Butler                    Director, Organ and Tissue Donation and Transplantation, Canadian  
Blood Services  
Ottawa, ON

Heidi Butler                        Clinical Operations Manager, BC Transplant  
Vancouver, BC

Julie Campbell                      Nurse Practitioner, Southwest Local Health Integration Network/  
London, ON  
*Representing the Canadian Association of MAiD Assessors and  
Providers*

Tricia Carter                        Donor Coordinator, Transplant Manitoba – Gift of Life  
Winnipeg, MB

Prosanto Chaudhury                Associate Director, General Surgery, Royal Victoria Hospital  
Montreal, QC  
*Representing the Canadian Society of Transplantation*

Janice Chisholm                    VG Site Chief Anesthesia, NS Health  
Halifax, NS  
*Representing the Canadian Association of MAiD Assessors and  
Providers*

|                     |                                                                                                                                                                           |
|---------------------|---------------------------------------------------------------------------------------------------------------------------------------------------------------------------|
| Rosanne Dawson      | Managing Counsel - Health Law Ethics & Privacy, Canadian Blood Services<br>Ottawa, ON                                                                                     |
| Karen Dryden-Palmer | Advanced Practice Nursing Leader/Clinical Nurse Specialist, Hospital for Sick Children<br>Toronto, ON<br><i>Representing Canadian Association of Critical Care Nurses</i> |
| Manuel Escoto       | Program, Manager, Canadian Donation and Transplantation Research Program<br>Edmonton, AB                                                                                  |
| Clare Fielding      | Clinical Nurse Specialist for Critical Care/Peter Munk Cardiac Centre and MSICU<br>Toronto, ON<br><i>Representing Canadian Association of Critical Care Nurses</i>        |
| Heather Gillespie   | Quality Assurance Coordinator, Alberta Health Services<br>Edmonton, AB                                                                                                    |
| Clay Gillrie        | Associate Director, Interprovincial Organ Sharing Programs, Canadian Blood Services<br>Vancouver, BC                                                                      |
| Scott Gordon        | Donor Coordinator, Alberta Health Services<br>Edmonton, AB                                                                                                                |
| Vanessa Gruben      | Law Professor, Human Rights, University of Ottawa<br>Ottawa, ON                                                                                                           |
| Andrew Healey       | Chief Medical Officer, Clinical Donation Services, Trillium Gift of Life Network<br>Toronto, ON                                                                           |
| Ban Ibrahim         | Legal Counsel, Canadian Blood Services<br>Ottawa, ON                                                                                                                      |
| Debbie Jefferson    | Manager and Quality Supervisor, Horizon Health Network<br>Moncton, NB                                                                                                     |
| Peggy John          | Associate Director, Program Operations, Canadian Blood Services<br>Vancouver, BC                                                                                          |
| Sean Keenan         | Provincial Medical Director, Donation Services, BC Transplant<br>Vancouver, BC                                                                                            |

|                     |                                                                                                                     |
|---------------------|---------------------------------------------------------------------------------------------------------------------|
| Kiran Khatar        | Organ Donation Educator, BC Transplant<br>Vancouver, BC                                                             |
| Kevin Klassen       | Intensivist/Donation Physician, Nova Scotia Health/Legacy of Life<br>Program<br>Sydney, NS                          |
| Steven Klotz        | Director, Critical Care, Respiratory Services and Organ Donation,<br>Saskatchewan Health Authority<br>Saskatoon, SK |
| Jehan Lalani        | Sr. Project Manager, System Development, Canadian Blood Services<br>Calgary, AB                                     |
| Alain Landry        | Program Manager, Legacy of Life and Critical Care Organ Donation,<br>Nova Scotia Health<br>Halifax, NS              |
| Marie Josée Lavigne | Chef du service de l'enseignement et du développement hospitalier,<br>Transplant Québec<br>Montréal, QC             |
| Sylvain Lavigne     | Directeur des services cliniques et des soins infirmiers, par interim,<br>Transplant Québec<br>Montréal, QC         |
| Rémi Leblanc        | Organ Donation Physician Champion, Dr. Georges-L.-Dumont<br>University Hospital Centre<br>Moncton, NB               |
| Janet MacLean       | Vice-President, Clinical Donation Services, Trillium Gift of Life<br>Network<br>Toronto, ON                         |
| Heather Miazga      | Critical Care Respiratory and Organ Donation/Transplant,<br>Saskatchewan Health Authority<br>Saskatoon, SK          |
| Owen Mooney         | Donation Physician, Transplant Manitoba – Gift of Life<br>Winnipeg, MB                                              |
| Angela Parsons      | Donor Coordinator, Organ Procurement & Exchange of Newfoundland<br>and Labrador<br>St. John's, NL                   |
| Angela Payne        | Manager, Organ and Tissue Donation Program, Saskatchewan<br>Health Authority<br>Regina, SK                          |
| Nichole Reise       | Patient Partner<br>Winnipeg, MB                                                                                     |

|                       |                                                                                                                                            |
|-----------------------|--------------------------------------------------------------------------------------------------------------------------------------------|
| Andrea Rochon         | Research Assistant, Children's Hospital of Eastern Ontario<br>Kingston, ON                                                                 |
| Nadya Savoie          | Administrative Director, New Brunswick Organ & Tissue Program<br>Moncton, NB                                                               |
| Christen Shoesmith    | Neurologist, London Health Sciences Centre<br>London, ON                                                                                   |
| Amina Silva           | Research Assistant, Children's Hospital of Eastern Ontario<br>Kingston, ON                                                                 |
| Vanessa Silva e Silva | Research Lead, Children's Hospital of Eastern Ontario<br>Ottawa, ON                                                                        |
| Janet Taylor          | Organ and Tissue Donation Coordinator, Trillium Gift of Life Network<br>London, ON                                                         |
| Aaron Trachtenberg    | Nephrology Fellow, University of Manitoba/Transplant Manitoba<br>Winnipeg, MB                                                              |
| Randy Tresidder       | Family Partner<br>Halifax, NS                                                                                                              |
| Sandra Wadsworth      | Family Partner<br>Winnipeg, MB                                                                                                             |
| Wendy Sherry          | MUHC Nurse Clinician for Organ & Tissue Donation, MUHC<br>Montreal, QC<br><i>Representing Canadian Association of Critical Care Nurses</i> |
| Marie-Josée Simard    | Directrice générale par intérim, Transplant Québec<br>Montréal, QC                                                                         |
| Kim Werestiuk         | Manager, Transplant Manitoba – Gift of Life<br>Winnipeg, MB                                                                                |
| Lori West             | CDTRP Scientific Director, University of Alberta<br>Edmonton, AB                                                                           |
| Donna Wonnick         | Patient Partner<br>Winnipeg, MB                                                                                                            |
| Lisa Zoeteman         | Donor Coordinator, Alberta Health Services<br>Calgary, AB                                                                                  |
